# Supplementary material for: Self-assembled Fluorescent Hybrid Nanoparticles-mediated Collaborative Lncrna CCAT1 Silencing and Curcumin Delivery for Synchronous Colorectal Cancer Theranostics
Source: Research Square preprint supplement (doi:10.21203/rs.3.rs-435554/v1), 2021-04-20
Supplement: Supplementary file 1 [file 051d03c54ebd38f7a0604329.docx]

Self-assembled fluorescent PEI-PDLLA/DSPE-mPEG hybrid micelles-mediated collaborative lncRNA CCAT1 silencing and curcumin delivery for synchronous colorectal cancer theranostics

Fan Jiaa,c,1 ,Yunhao Lib,1, Xiongwei Denga,*,Xuan Wanga,c, Xinyue Cuia, Jianqing Lua,*, Zian Pan a,c ,Yan Wua,c,*

a*CAS Key Laboratory for Biomedical Effects of Nanomaterials and Nanosafety, CAS Center for Excellence in Nanoscience, National Center for Nanoscience and Technology, Beijing 100190, China*

b*Department of General Surgery, Peking Union Medical College Hospital, Peking Union Medical College, Chinese Academy of Medical Sciences, Beijing 100730, P. R. China*

c*University of Chinese Academy of Sciences, Beijing 100049, P. R. China*

*Corresponding author at: CAS Key Laboratory for Biomedical Effects of Nanomaterials and Nanosafety, CAS Center for Excellence in Nanoscience, National Center for Nanoscience and Technology, Beijing 100190, China

*E-mail addresses*: [dengxiongwei.happy@163.com](mailto:dengxiongwei.happy@163.com) (X. Deng), [lujq@nanoctr.cn](mailto:lujq@nanoctr.cn(J) (J. Lu),wuy@nanoctr.cn (Y. Wu)

1Fan Jia and Yunhao Li contributed equally to this work.


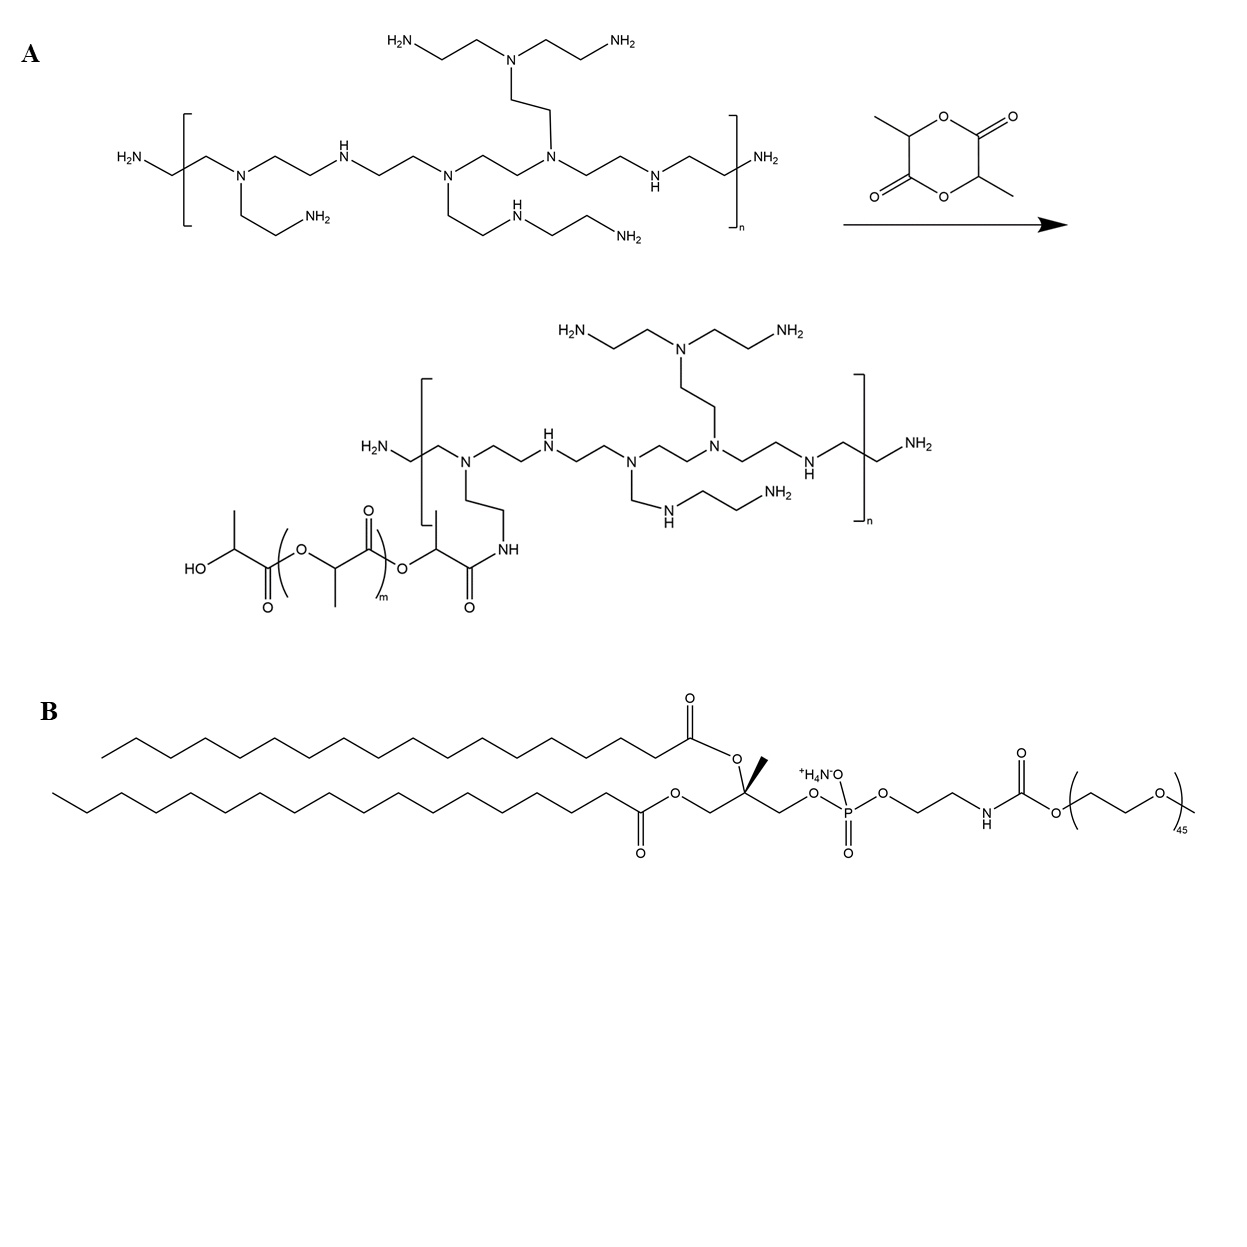


Scheme. S1 (A) Synthesis route of PEI-PDLLA and (B) The structure of DSPE–mPEG2000.


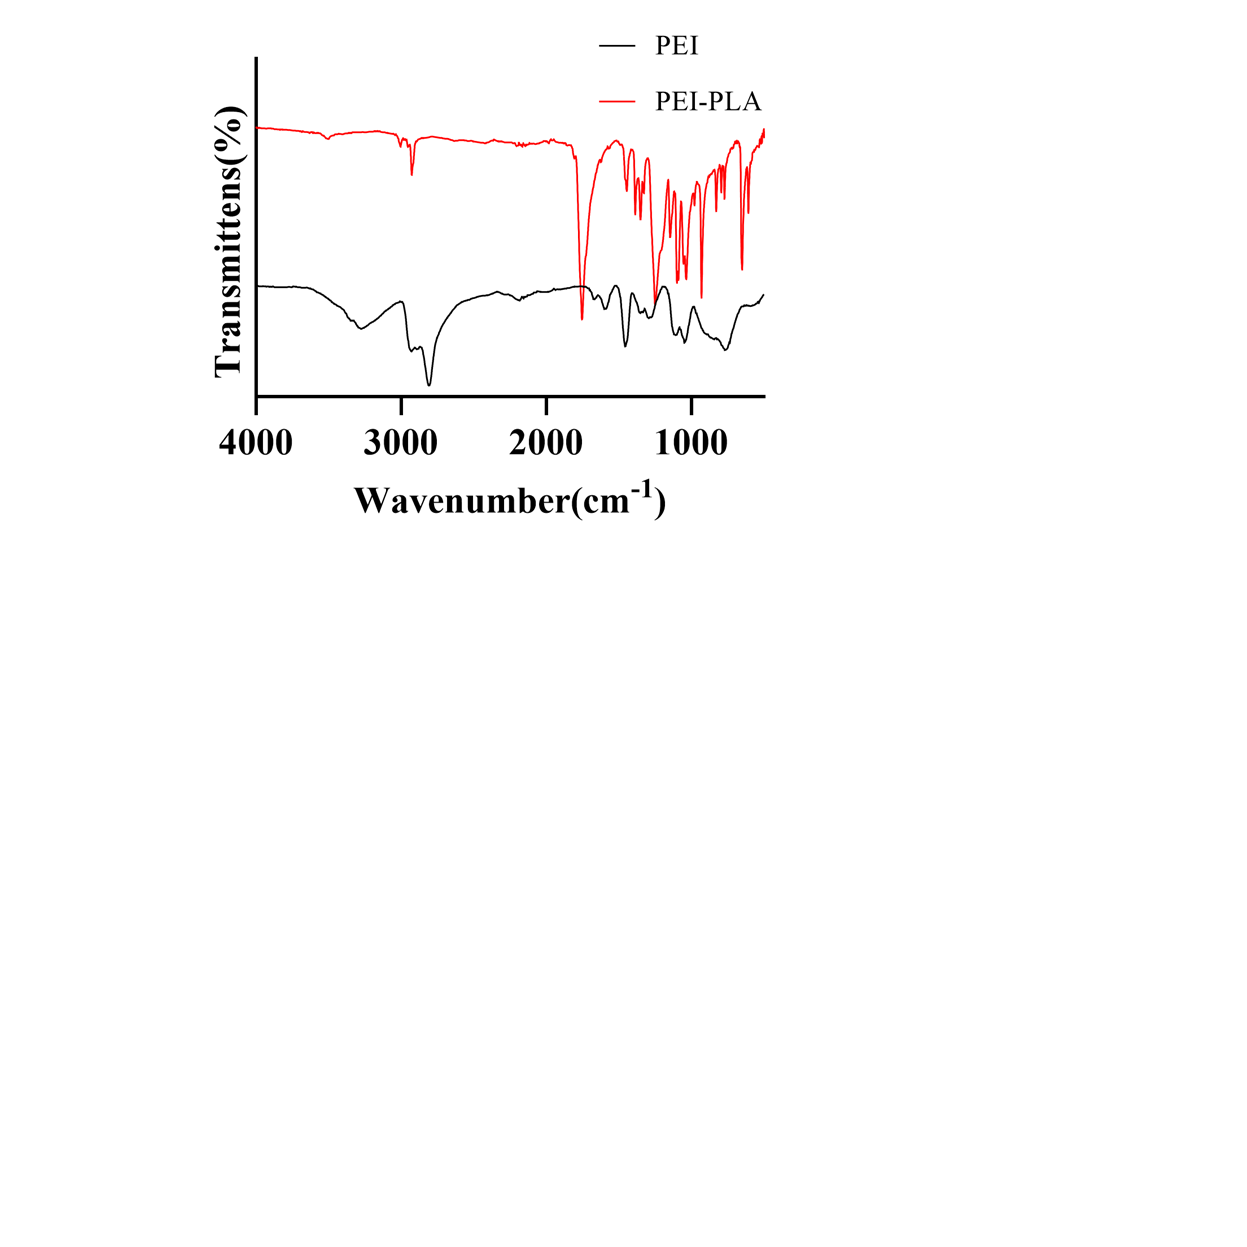


Fig. S1 FT-IR spectrum of PEI and PEI-PDLLA.


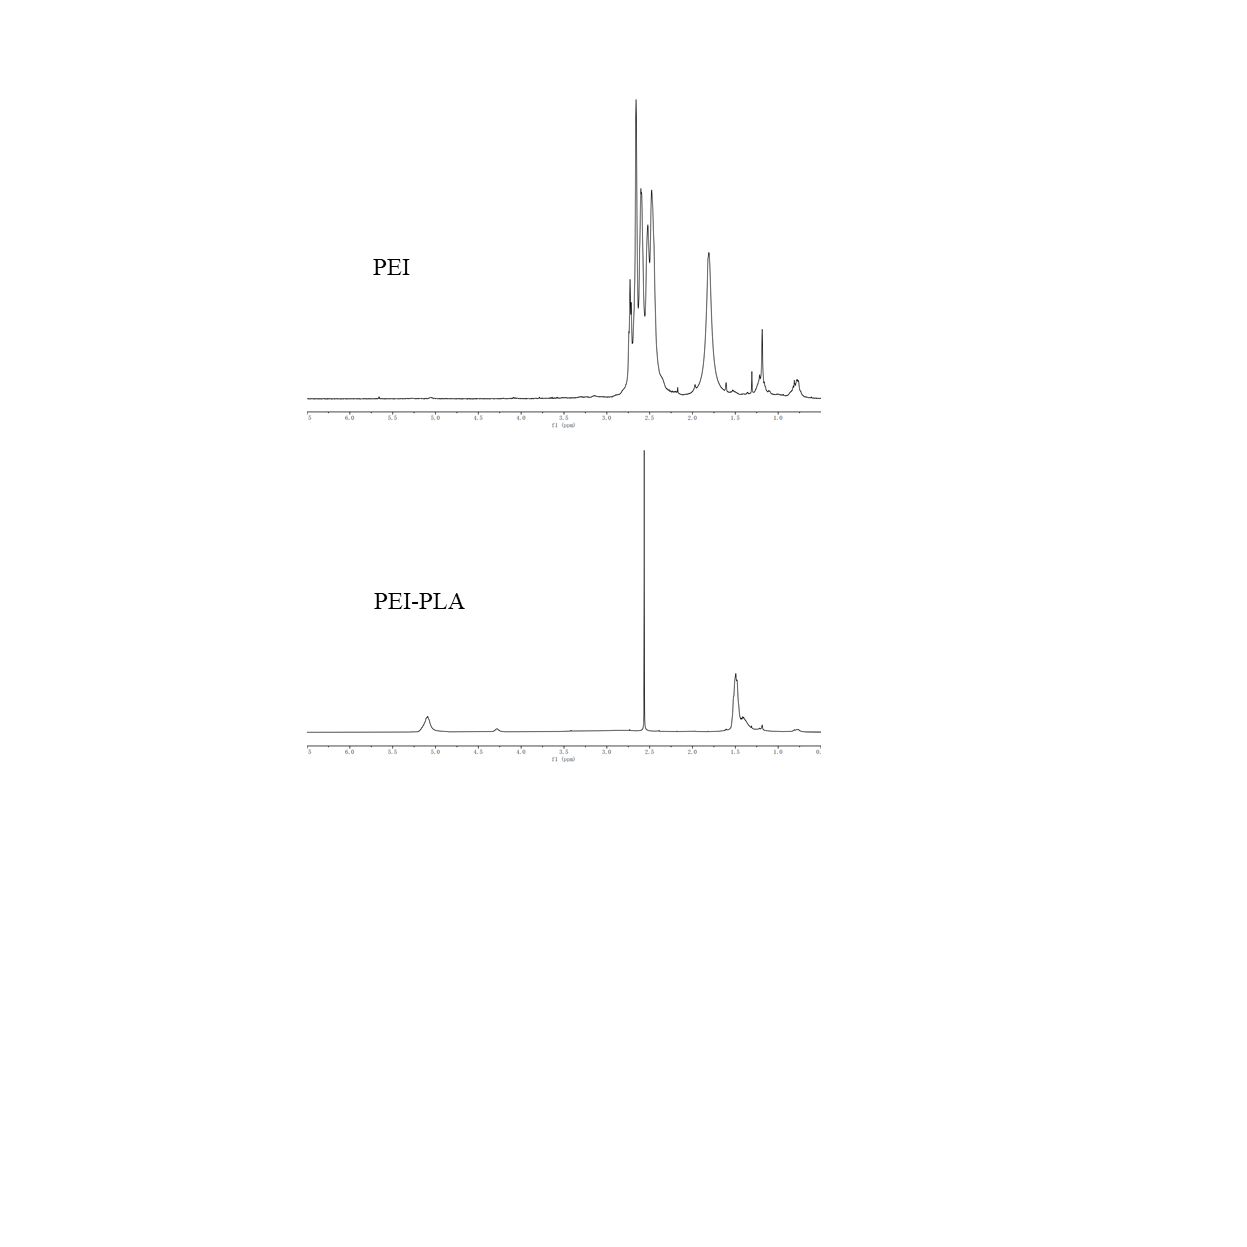


Fig. S2 1H NMR spectrum of PEI and PEI-PDLLA (The deuterated chloroform (CDCl3) was used as solvent).


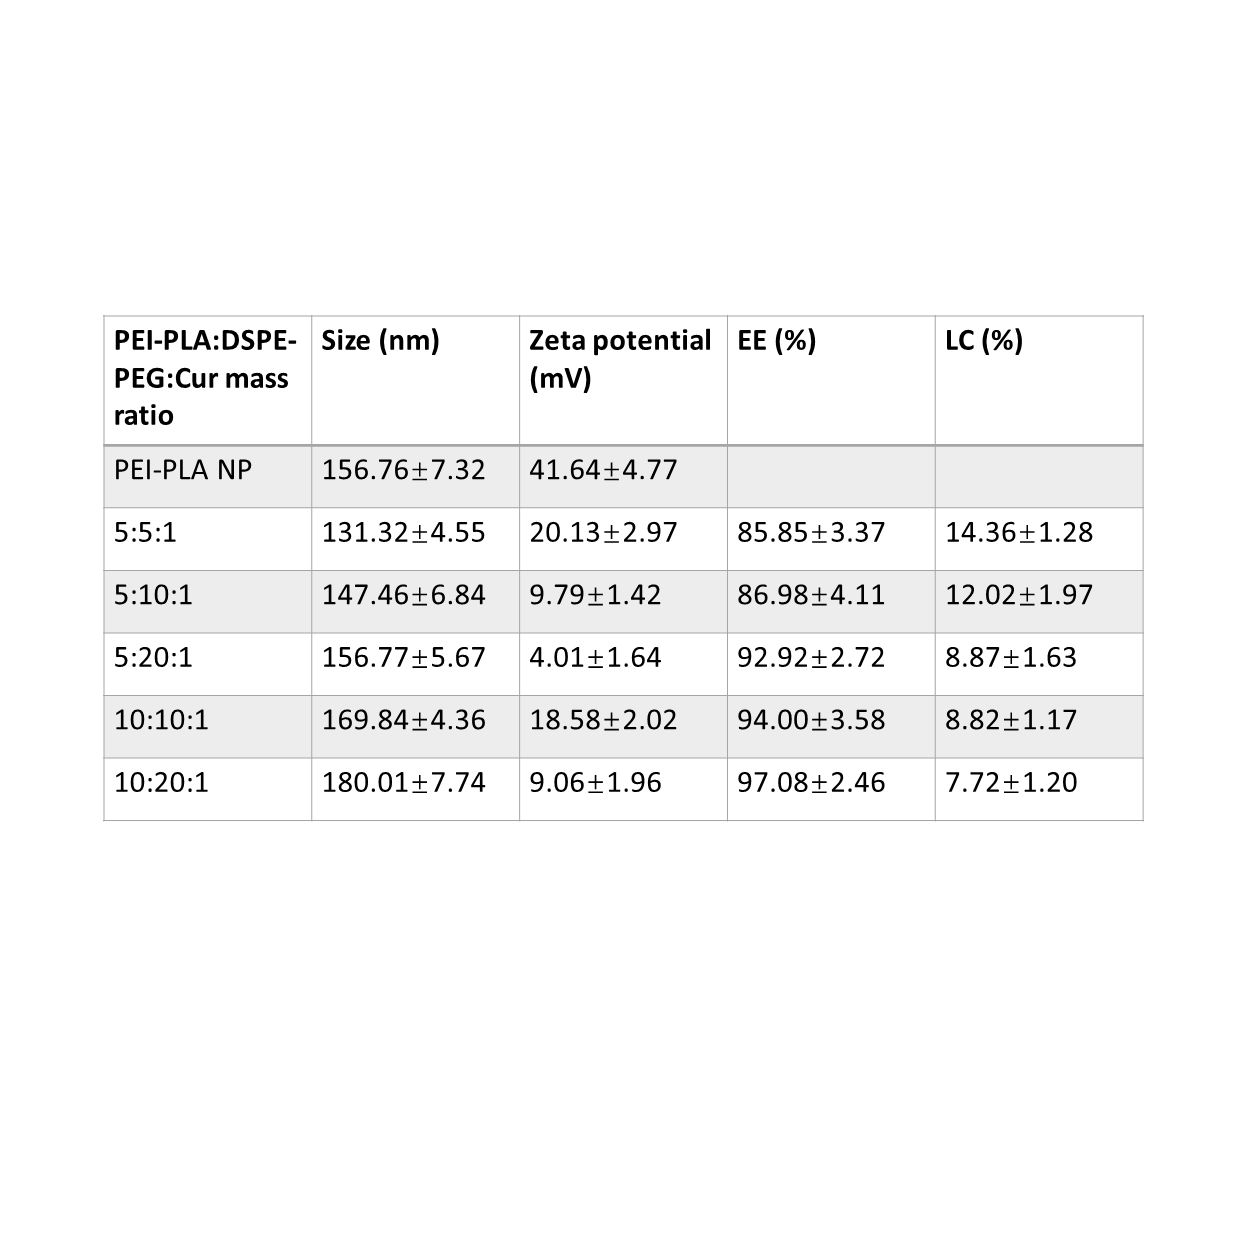


Table. S1 The influences of formulation parameters on the size, zeta potential and Cur drug encapsulation efficiency (EE) and loading content (LC).


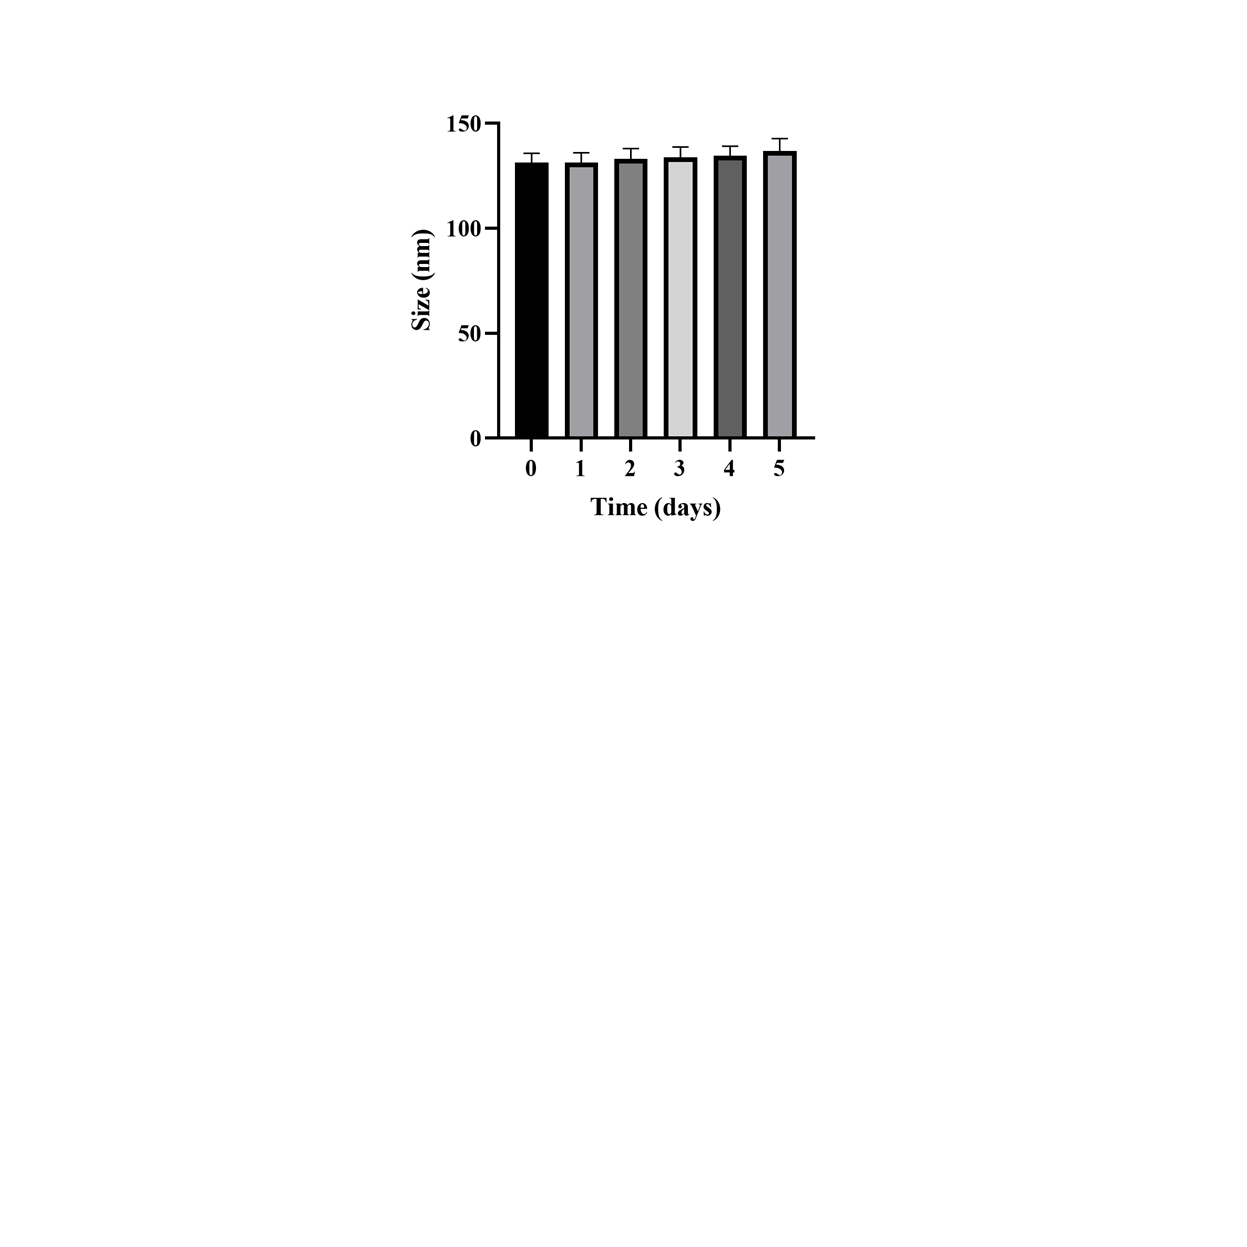


Fig. S3 The average size of CSNP after maintained in PBS for different time intervals.


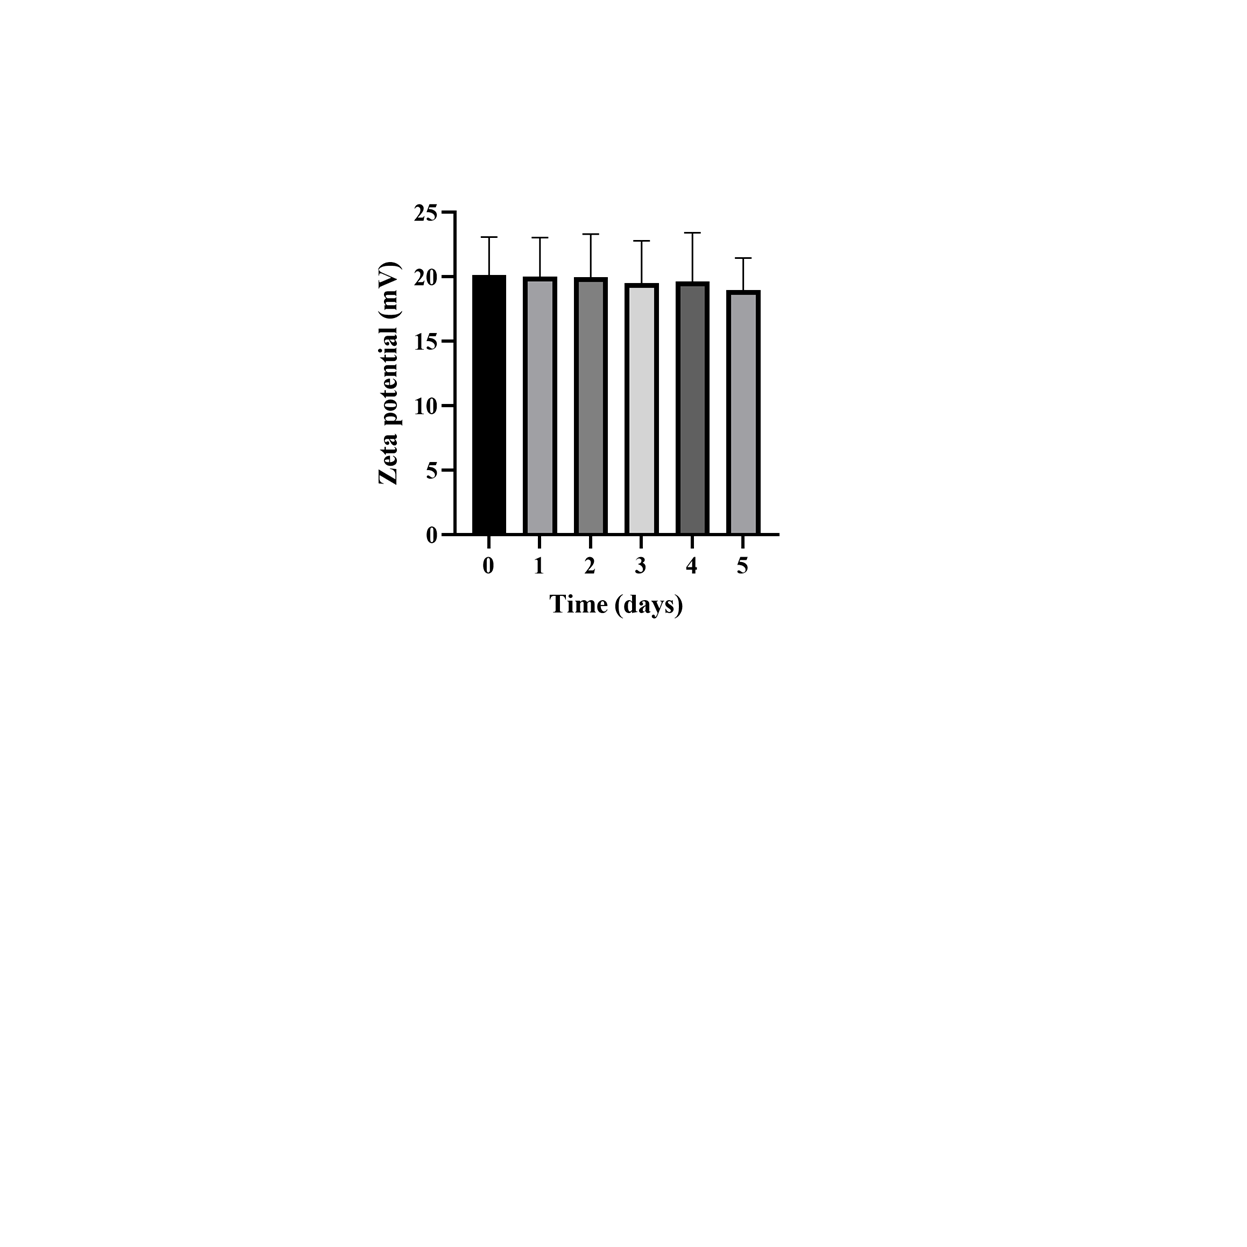


Fig. S4 Zeta potential of CSNP in PBS (pH = 7.4) at different time intervals.


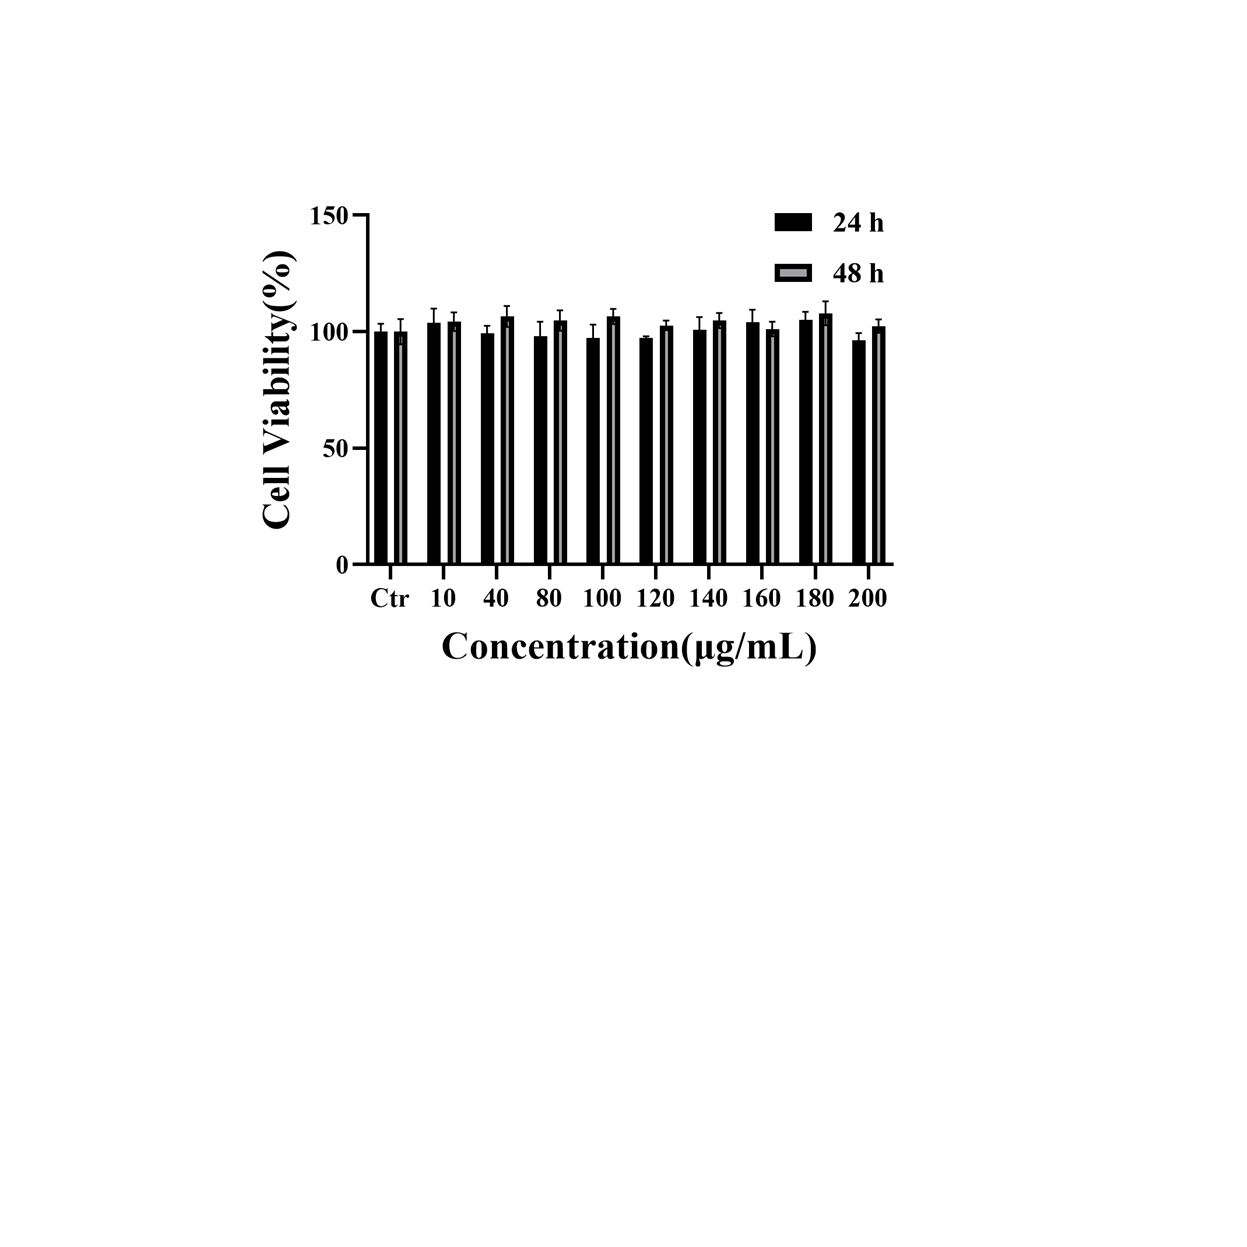


Fig. S5 Cytotoxicity of PEI-PDLLA/DSPE-mPEG blank micelles.
